# Supplementary material for: Topological defects stabilized by a soft twist-bend dimer and quantum dots lead to a wide thermal range and ultra-fast electro-optic response in a liquid crystalline amorphous blue phase
Source: Royal Society of Chemistry journal article supplement (doi:10.1039/d3tc00861d), 2023-01-01
Supplement: d3tc00861d2.pdf [file d3tc00861d2.pdf]

## Supplementary Information

### **Topological defects stabilized by soft twist-bend dimer and quantum dots lead to a wide thermal range and ultra-fast electro-optic response in a liquid crystalline amorphous blue phase**

Nurjahan Khatun,<sup>a,b</sup> Vimala Sridurai,<sup>a</sup> Katalin F. Csorba<sup>c</sup> and Geetha G. Nair<sup>a\*</sup>

<sup>a</sup> Centre for Nano and Soft Matter Sciences, Bangalore 562162, India

<sup>b</sup> Manipal Academy of Higher Education, Manipal 576104, India

<sup>c</sup> Research Institute for Solid State Physics and Optics of the Hungarian Academy of Sciences  
Budapest, Hungary

\* E-mail: [geeraj88@gmail.com](mailto:geeraj88@gmail.com), [ggnair@cens.res.in](mailto:ggnair@cens.res.in)

## S1. Chemical structures and phase transition temperatures

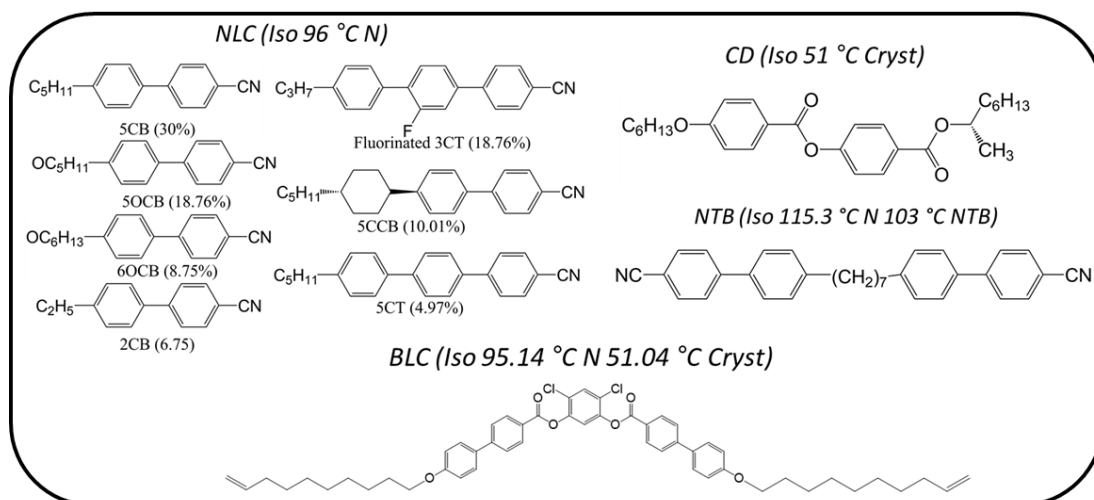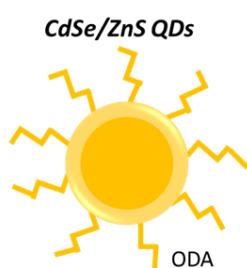

*Compositions:*

- i. 20 wt.% NTB + (45 wt.% CD in NLC) (host BPLC or BP45)
- ii. 0.005 wt.% QD in BP45 (QD-BPLC)
- iii. 20 wt.% BLC + (45 wt.% CD in NLC)

*Phase transition temperatures:*

- i. host BPLC: Iso 45.3 °C BPI 25 °C Ch
- ii. QD-BPLC: Iso 45 °C BPIII 11 °C Ch
- iii. 20 wt.% BLC + (45 wt.% CD in NLC): Iso 52 °C BPI 48.5 °C Ch

**Figure S1.** Chemical structures and phase transition temperatures of the individual compounds that constitute the BPLC mixtures. The compositions and phase transition temperatures of the mixtures are also shown.

## S2. Characterization of CdSe/ ZnS core-shell quantum dots:

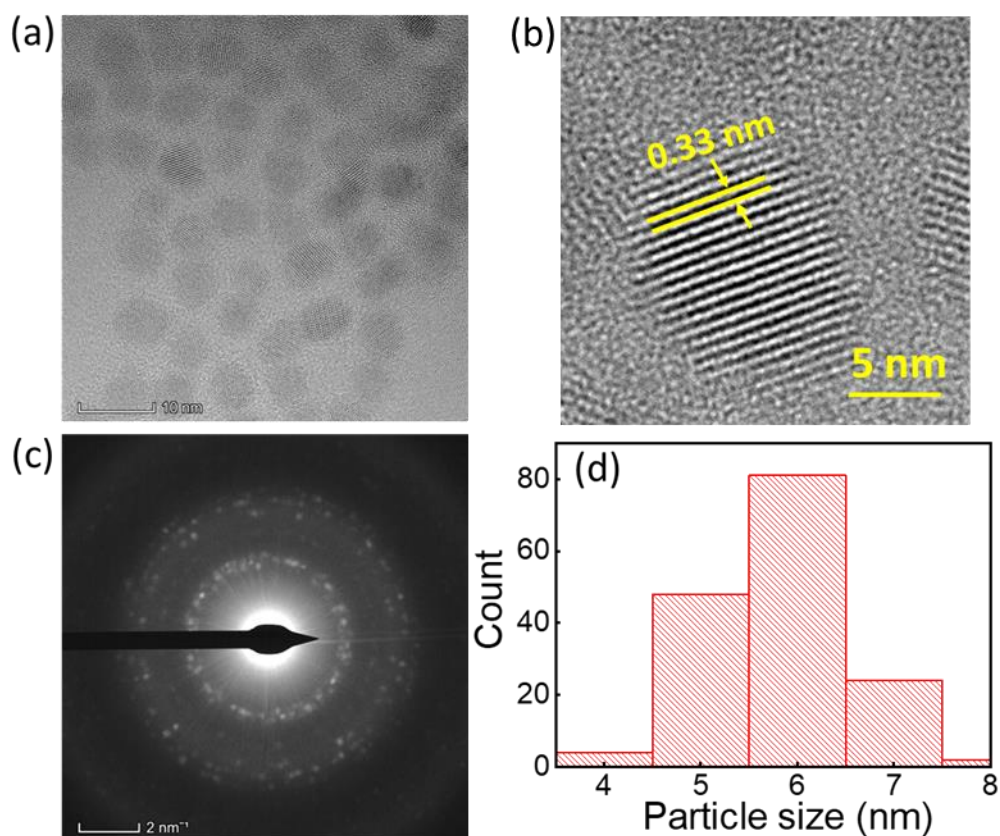

**Figure S2.** (a), (b) The HRTEM images, (c) SAED pattern and (d) particle size distribution of the CdSe/ZnS core-shell QDs. The average size of the QDs is  $5.8 \pm 0.7$  nm (calculated using Image J software).

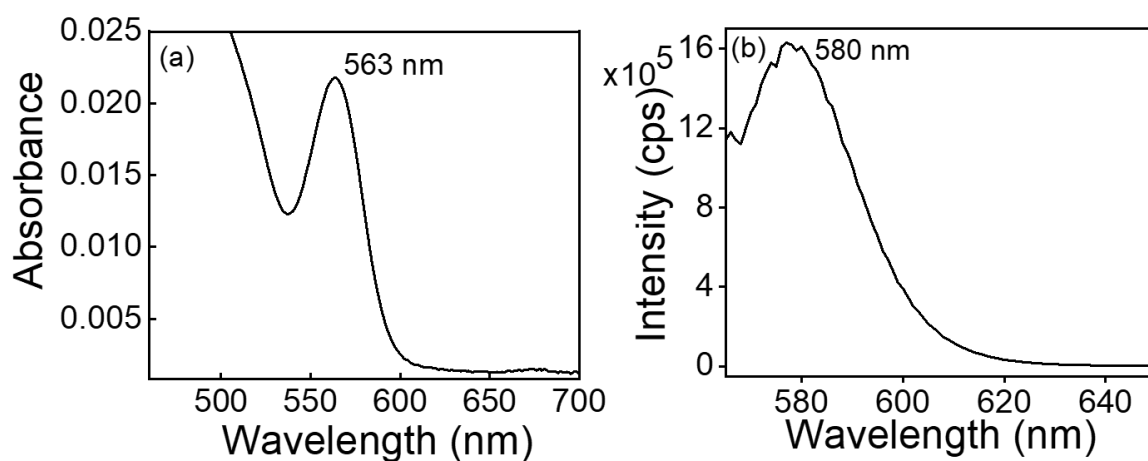

**Figure S3.** (a) Absorption and (b) emission spectra of CdSe/ZnS QDs dispersed in toluene.

### S3. POM textures of the BPLC mixtures

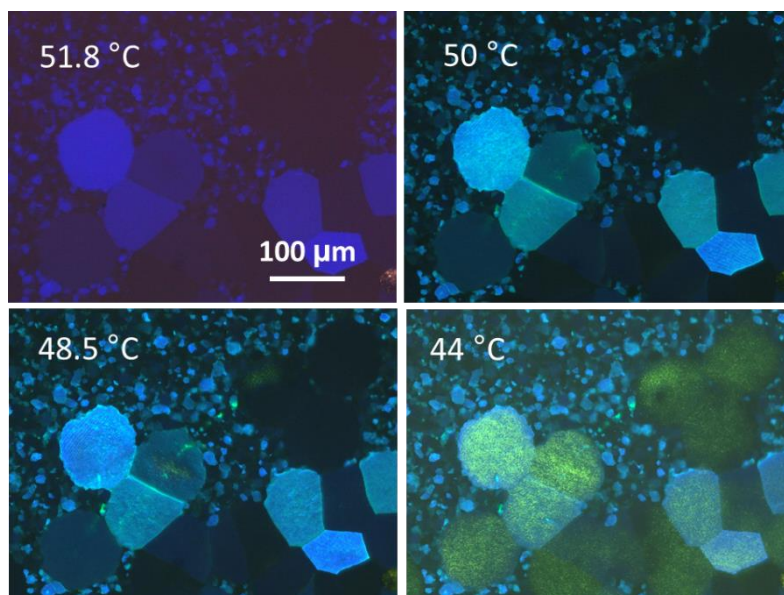

**Figure S4.** POM textures of 20% BLC + (45% CD in NLC) in BPI (51.8 °C and 50 °C) and Ch (44 °C). The texture at 48.5 °C corresponds to the onset to Ch.

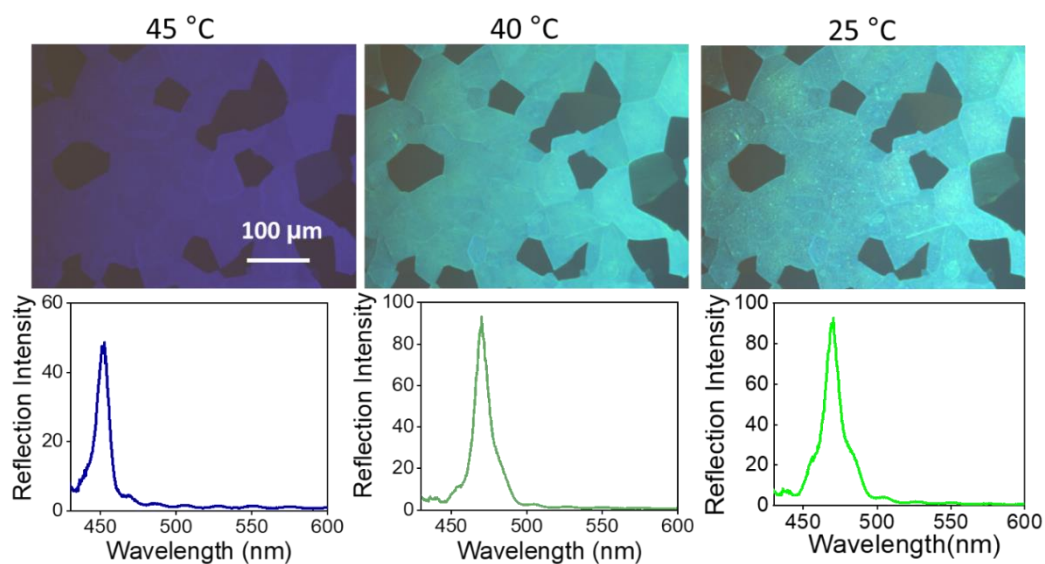

**Figure S5.** POM images (top row) and the corresponding selective reflection spectra (bottom row) of 20% NTB + (45% CD in NLC) mixture at different temperatures in BPI.

**Table S1.** Phase sequence and transition temperatures of the QD doped BPLC composites with different concentrations of CD

| Wt.% of CD in NLC (with NTB fixed at 20 wt. %) | Phase sequence and phase transition temperatures   | Thermal range of BP III |
|------------------------------------------------|----------------------------------------------------|-------------------------|
| 30                                             | Iso 66 °C BP III 65 °C BP II 62.8 °C BP I 58 °C Ch | 1 °C                    |
| 35                                             | Iso 58 °C BP III 56 °C BP I 44 °C Ch               | 2 °C                    |
| 40                                             | Iso 48.6 °C BP I 35 °C Ch                          | --                      |
| 45                                             | Iso 45 °C BP III 11 °C (remains in BP III)         | 34 °C                   |

#### S4. POM images of QD-BPLC sample at different temperatures

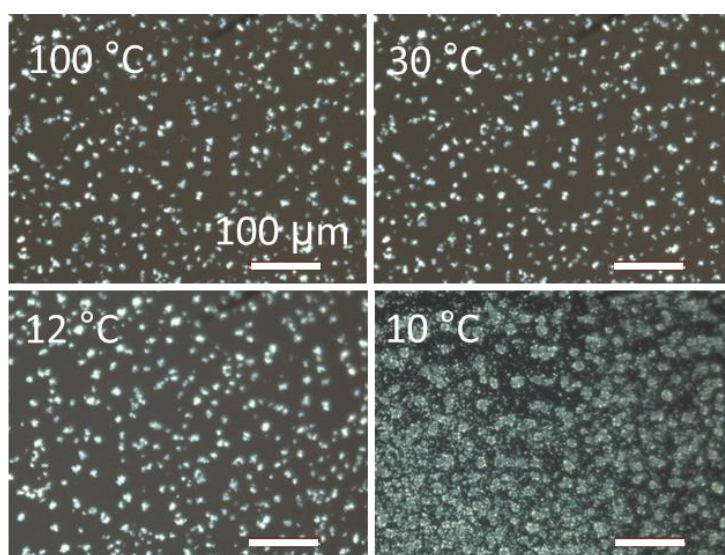

**Figure S6:** The POM images of QD-BPLC captured in the Iso phase (100 °C), BP III (30 °C and 12 °C) and Ch phase (10 °C) between crossed polarizers.

#### S5. Determination of BP III from Iso by optical activity

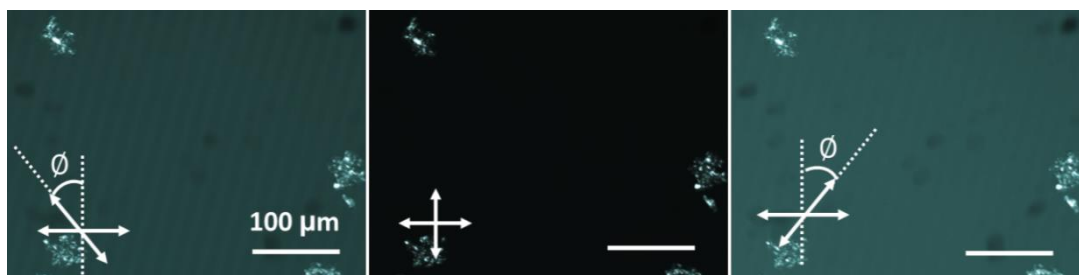

**Figure S7:** POM images of the QD-BPLC sample when analyzer is fixed at  $-10^\circ$  (left),  $0^\circ$  (middle) and  $+10^\circ$  (right) with respect to the polarizer.

#### S6. Determination of BP III from Iso by Circular Dichroism spectroscopy

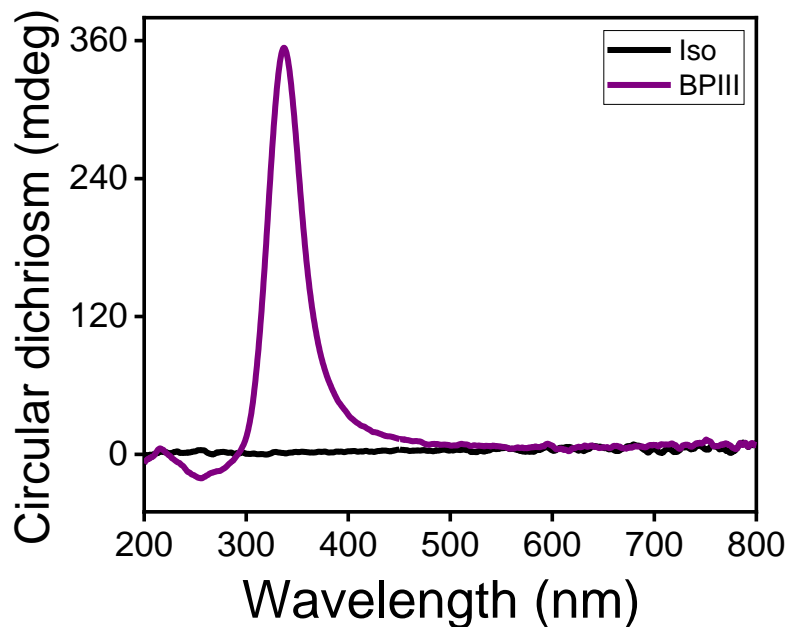

**Figure S8:** Circular dichroism spectra of QD-BPLC sample at Iso and BP III phases.

#### S7. Determination of phase transition of QD-BPLC by DSC

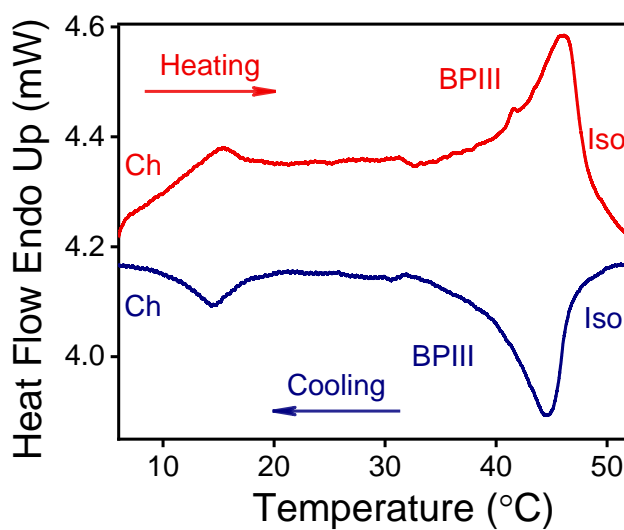

**Figure S9:** DSC profile for QD-BPLC sample in both heating and cooling cycles obtained at a rate of  $5^\circ\text{C}/\text{min}$ .

### S8. POM image with QDs concentration of 0.1%

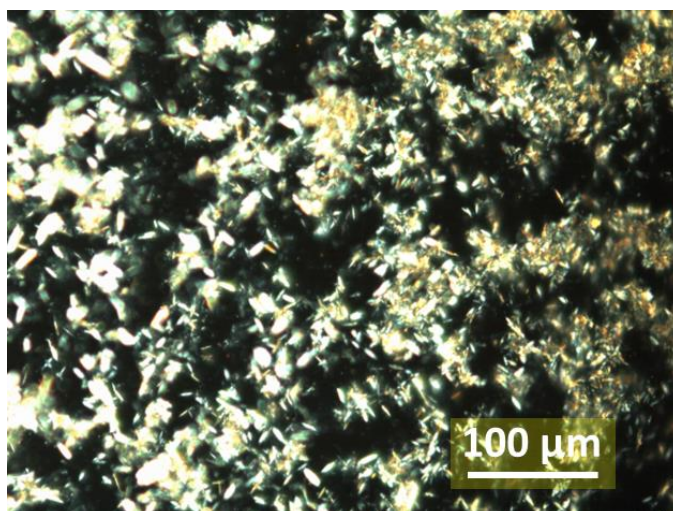

**Figure S10:** POM textures of 0.1% QD doped in BPLC

### S9. Electro-optic switching studies of QD-BPLC:

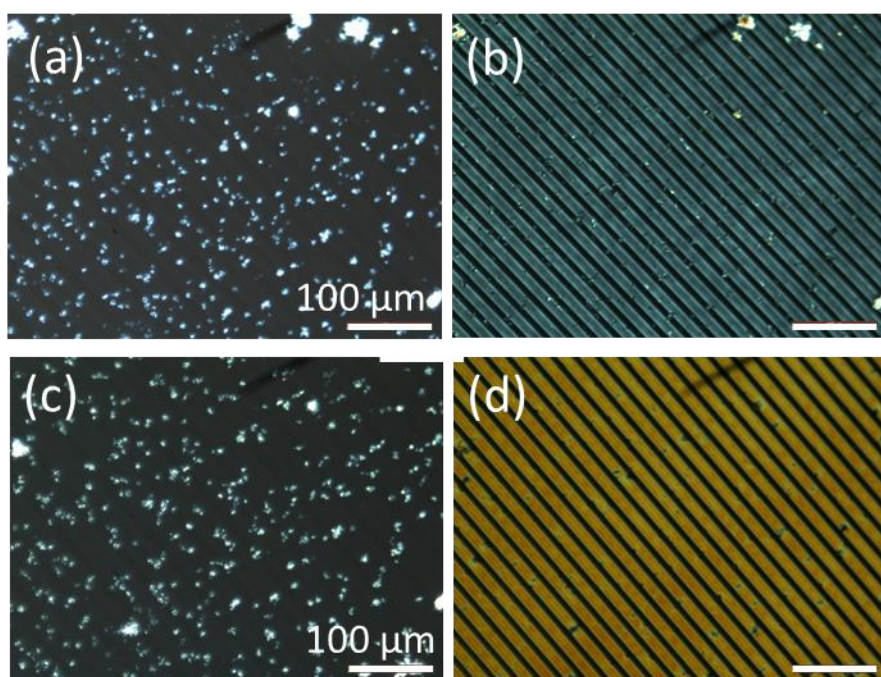

**Figure S11.** POM images of the QD-BPLC composite: (a), (c) without electric field, i.e., OFF-state and (b), (d) with electric field (25 V/μm), i.e., the ON-state, at 35 °C (top row) and 20 °C (bottom row), respectively. The stripes in (b) and (d) are due to the in-plane electrode pattern.

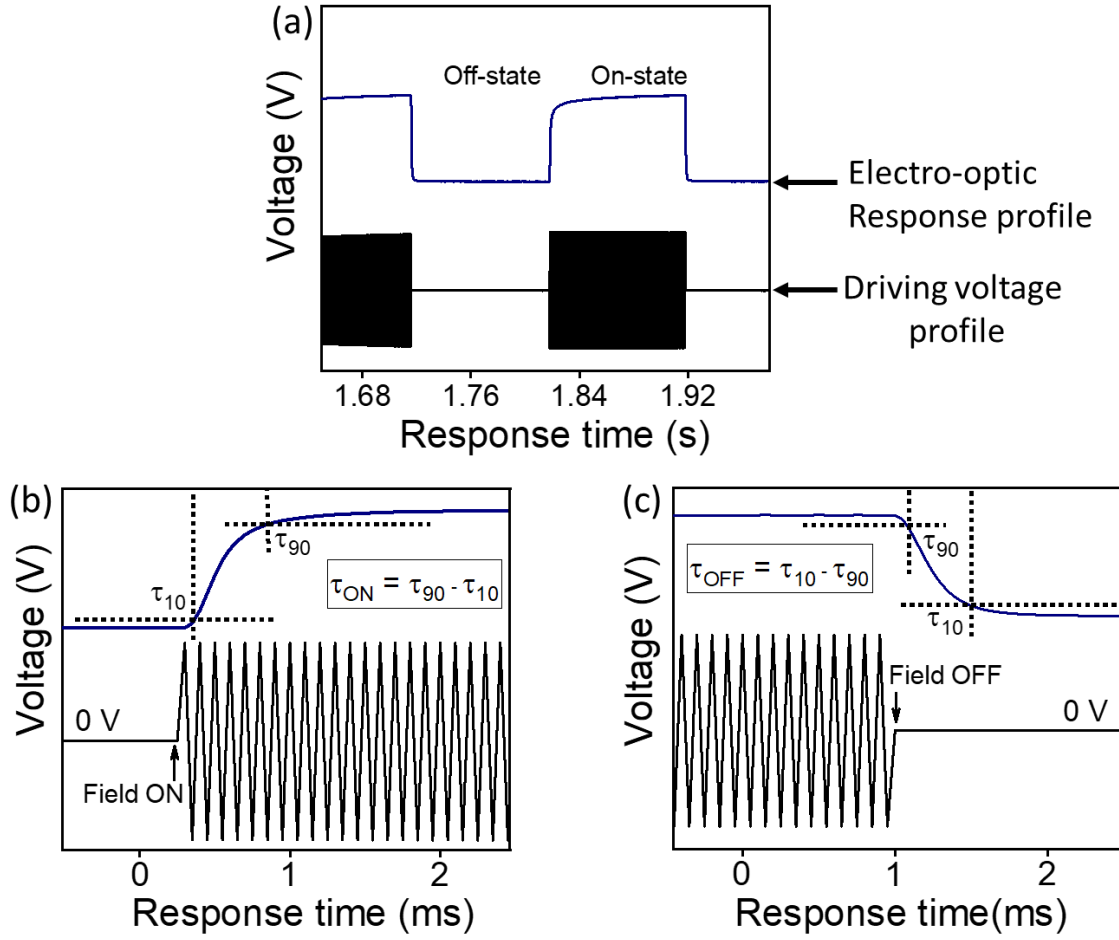

**Figure S12.** (a) Driving voltage and the electro-optic response profiles. Enlarged view of the (b) ON and (c) OFF states for the QD-BPLC sample. The  $\tau_{ON}$  ( $\tau_{90} - \tau_{10}$ ) and  $\tau_{OFF}$  ( $\tau_{10} - \tau_{90}$ ) are defined as the time taken for the transmitted intensity to vary from 10% to 90% and 90% to 10% of the maximum transmitted intensity, respectively, as depicted in the figure.

**Movie S1.** Electro-optic switching of QD-BPLC. The applied electric field is 25 V/  $\mu\text{m}$  (ac, sine, 10 kHz)
